# Supplementary material
Source: PubMed Central journal article supplement (PMC9815946)
Supplement: NIHMS1848037-supplement-1.pdf [file NIHMS1848037-supplement-1.pdf]

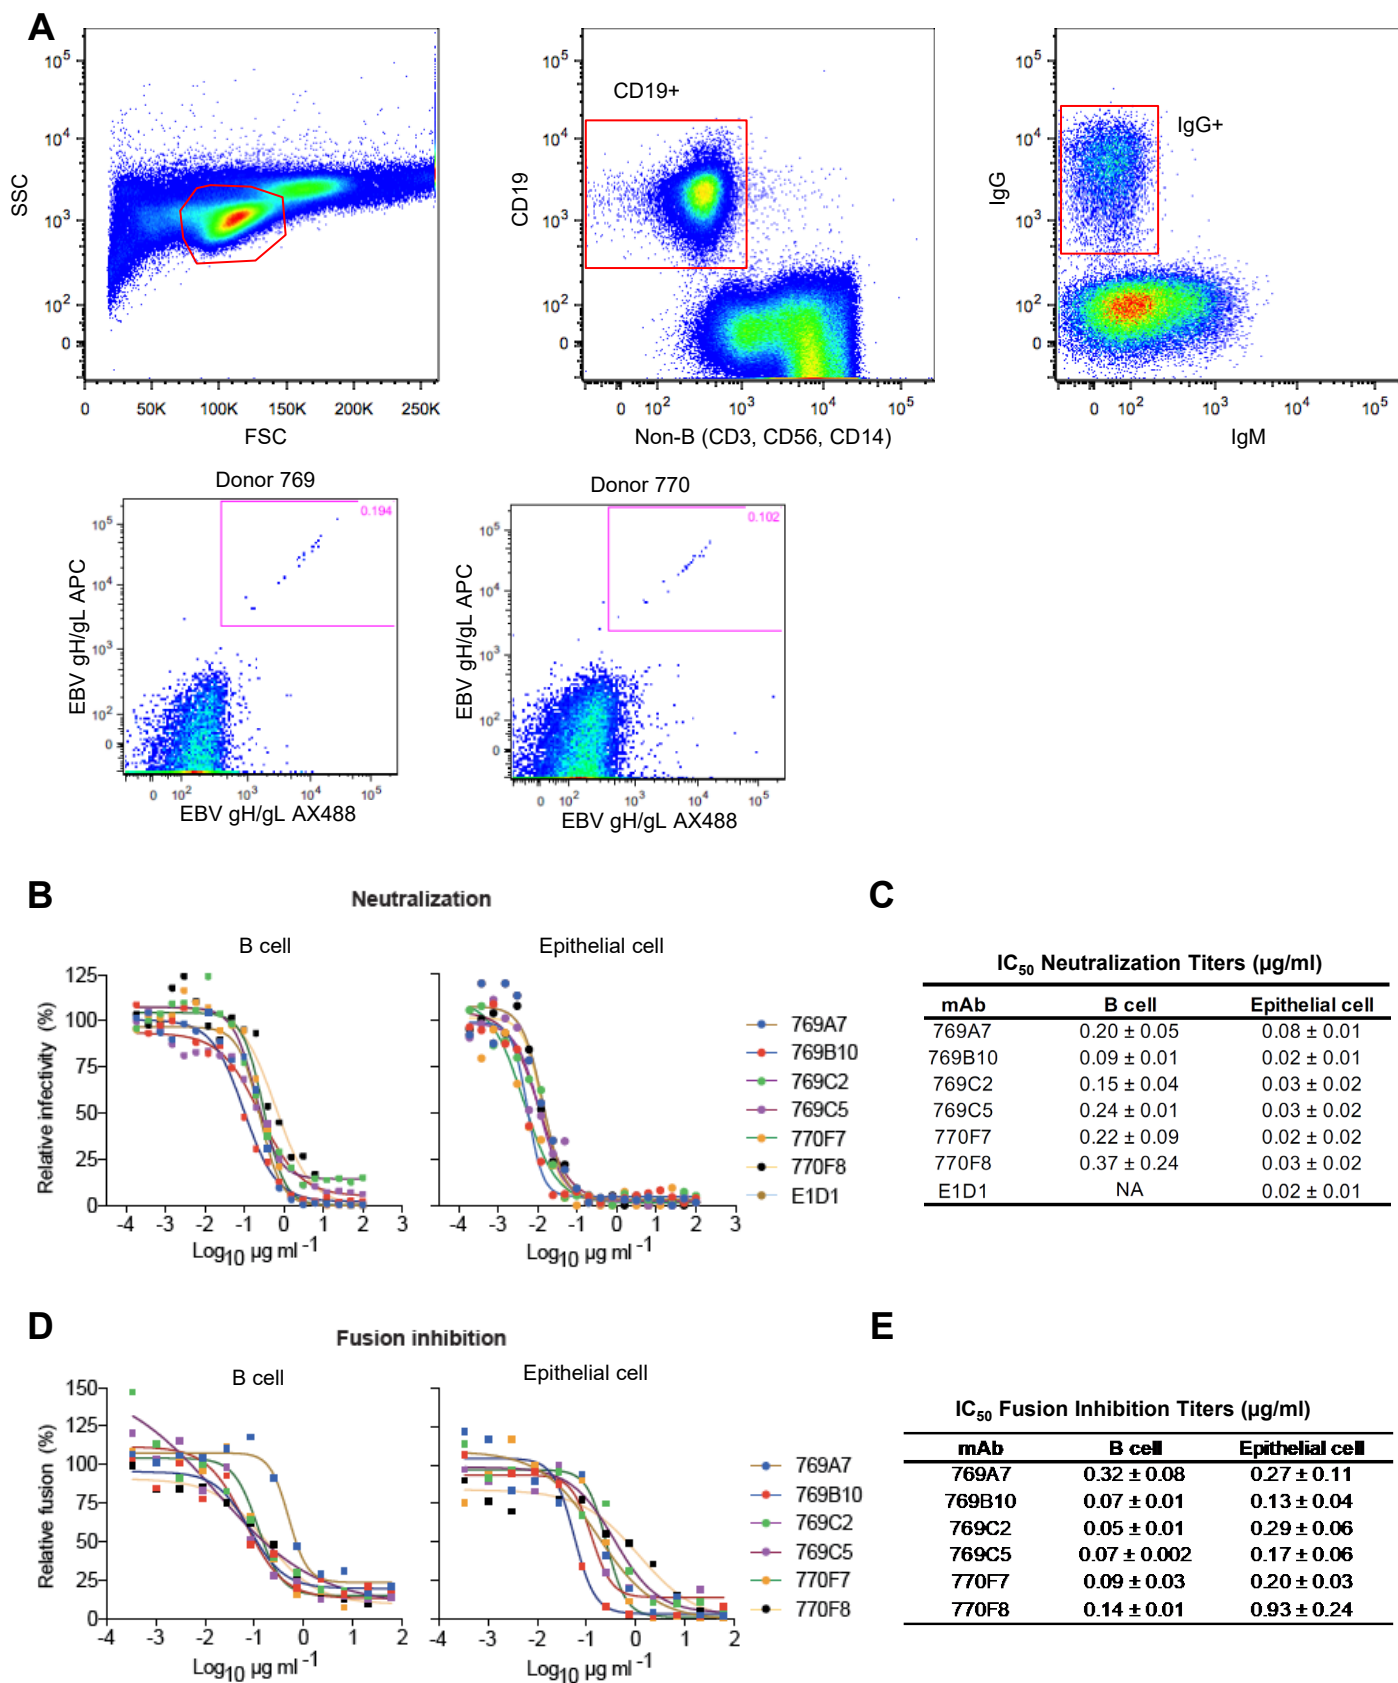

**Figure S1. Characterization of EBV gH/gL-targeting antibodies (related to Figure 1)**

(A) Flow cytometry plots of antibody sort using labeled EBV gH/gL recombinant protein.

(B,C) Neutralization of EBV infection in B cells and epithelial cells by mAbs.

(D,E) Inhibition of B cell and epithelial cell fusion by isolated mAbs.

**A**

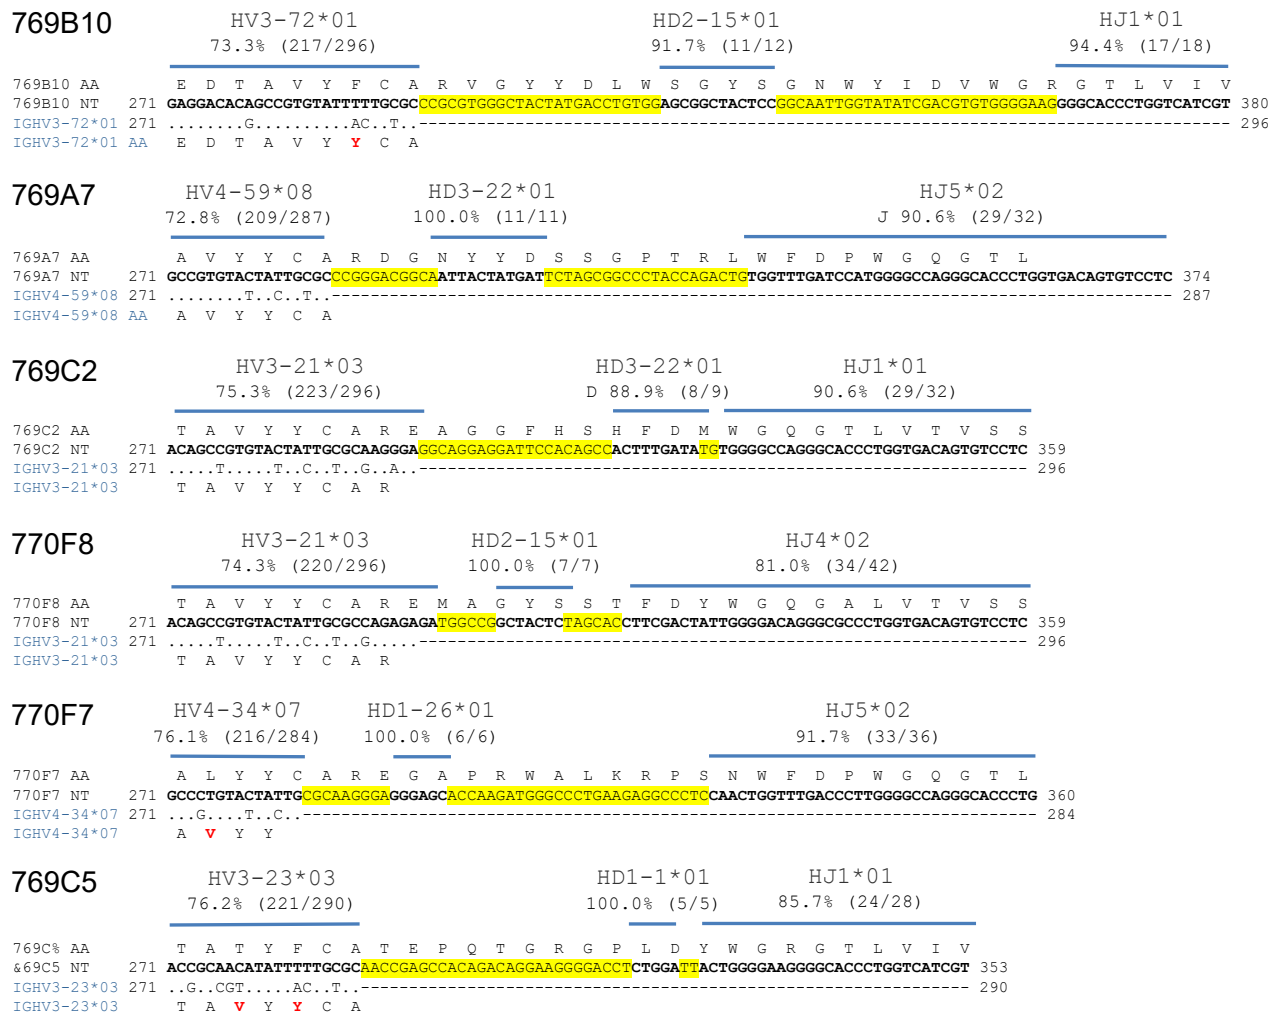

**B**

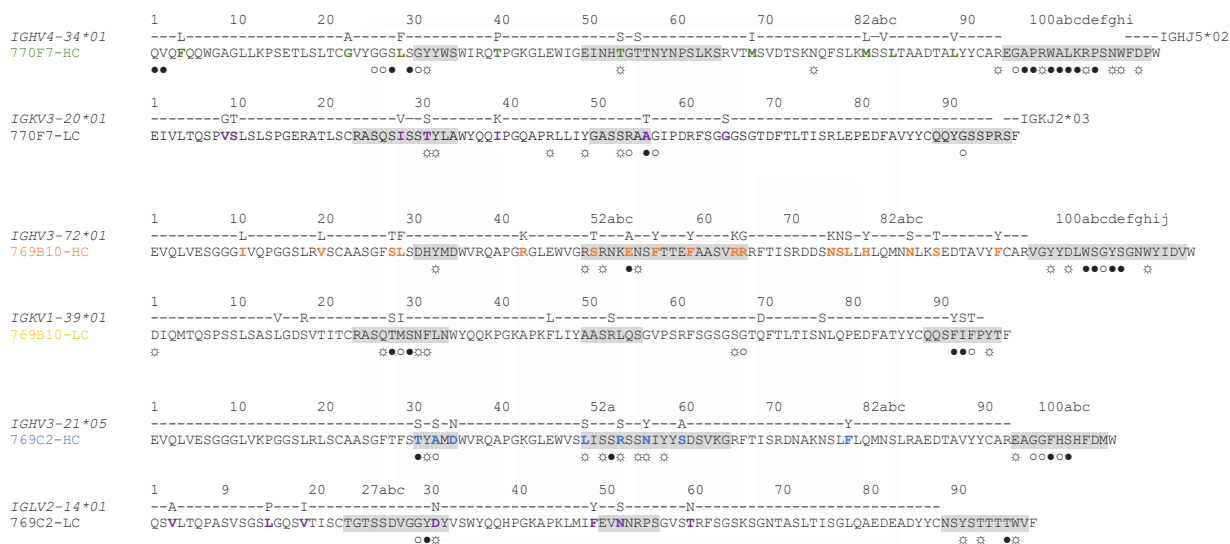

**Figure S2 Immunoglobulin gene recombination analysis of EBV gH/gL neutralizing antibodies (related to Figure 1-5).**  
 (A) Sequence alignment of EBV gH/gL-targeting antibody CDR3 recombination region with their respective germline genes.  
 (B) Sequence alignment of EBV gH/gL-targeting antibodies and their respective precursor germline genes. Antibody residues that interact with EBV gH/gL are indicated (open circles denote antibody main chain-only contacts, open circles with rays denote antibody side-chain-only contacts and filled circles denote both main-chain and side-chain contacts).

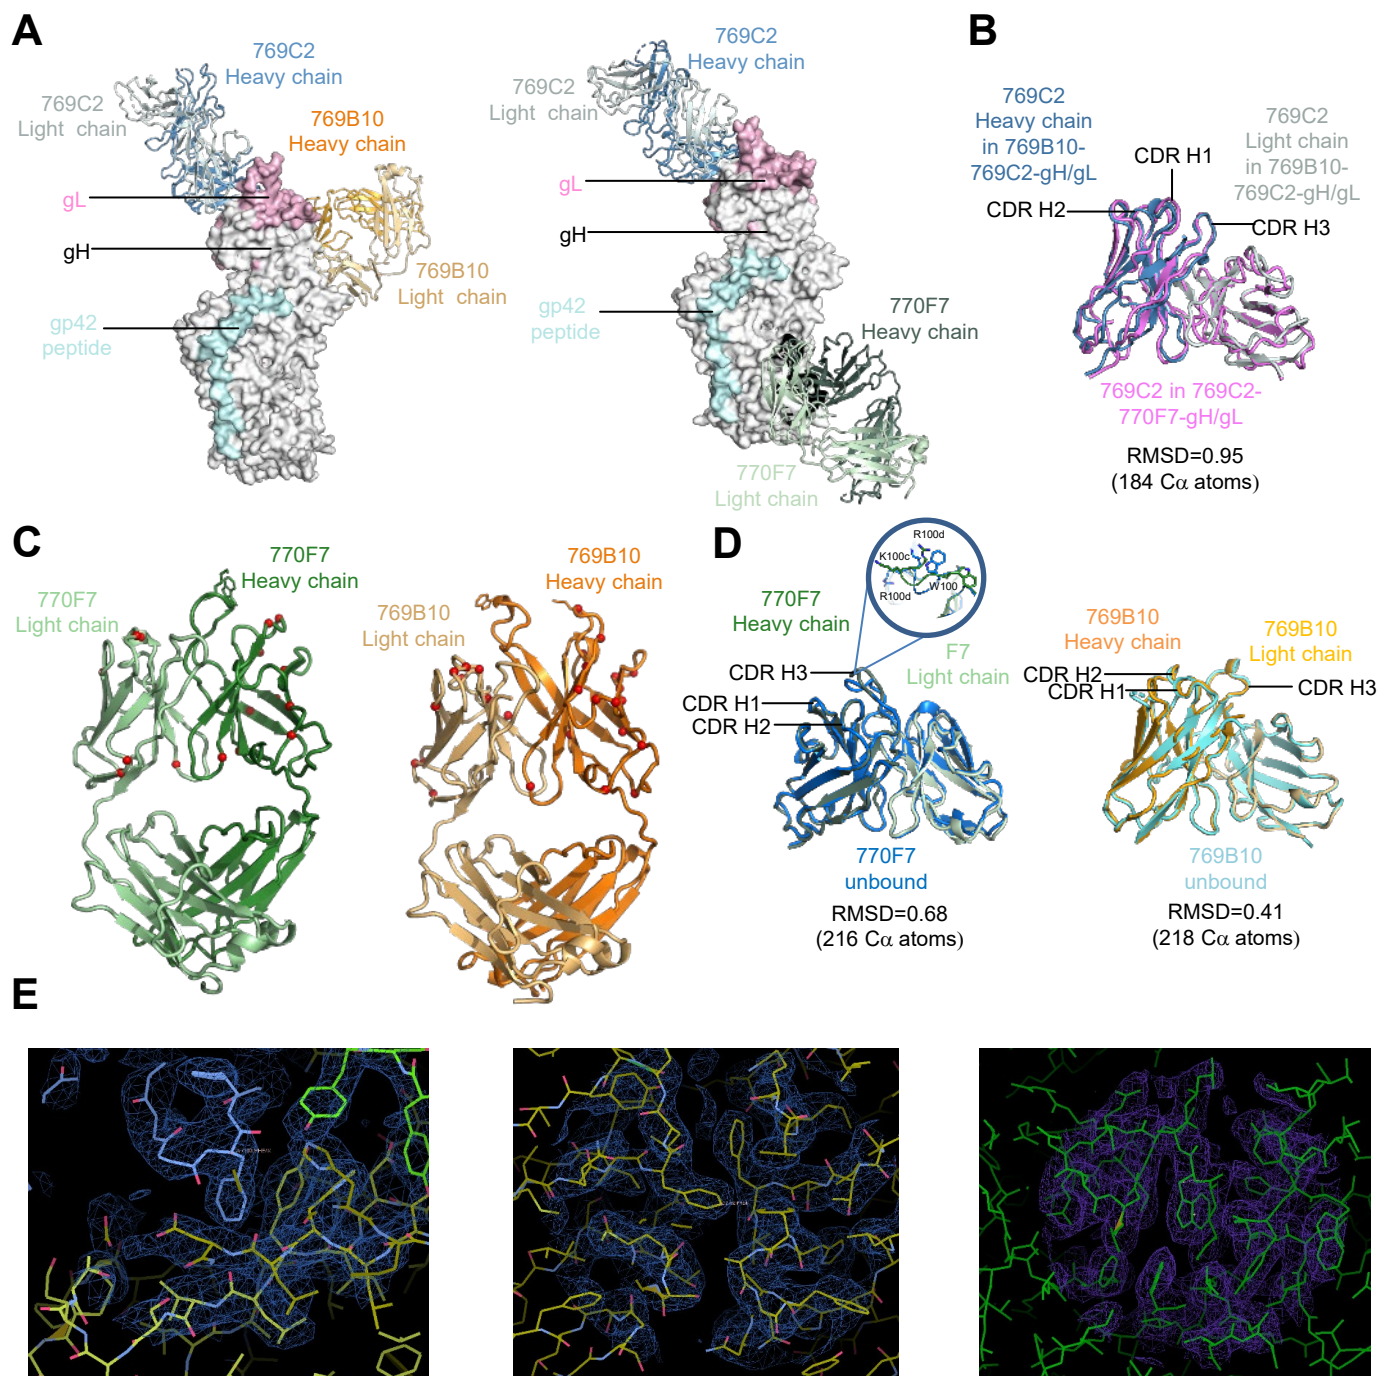

**Figure S3. Crystal structures of EBV gH/gL-targeting antibodies (related to Figures 2-5)**

(A) Crystal asymmetric unit of the two EBV gH/gL/gp42p antibody complexes. (Left) 769C2 and 769B10 Fabs in complex and (right) 769C2 and 770F7 in complex with EBV gH/gL/gp42 respectively.

(B) Overlay of 769C2 Fv region from the two crystal structures.

(C) Crystal structure of 770F7 Fab (left) and 769B10 (right).

(D) Overlay of the Fv regions of 770F7 and 769B10 from bound and unbound structures. A zoom-in view of the 770F7 CDR H3 region with select residues shown in stick representation.

(E) Representative electron density images of the mAb-gH/gL interfaces. *Left*, 769C2 interface with EBV gH/gL centered on 769C2 CDR H3 Phe99 (Kabat numbering); *Center*, 769B10 interface with EBV gH/gL centered on 769B10 CDR L3 Phe92; *Right*, 770F7 interface with EBV gH/gL centered on 770F7 CDR H3 Trp100. Electron density 2Fo-Fc map is contoured at 1  $\sigma$  for all panels.

Figure S4

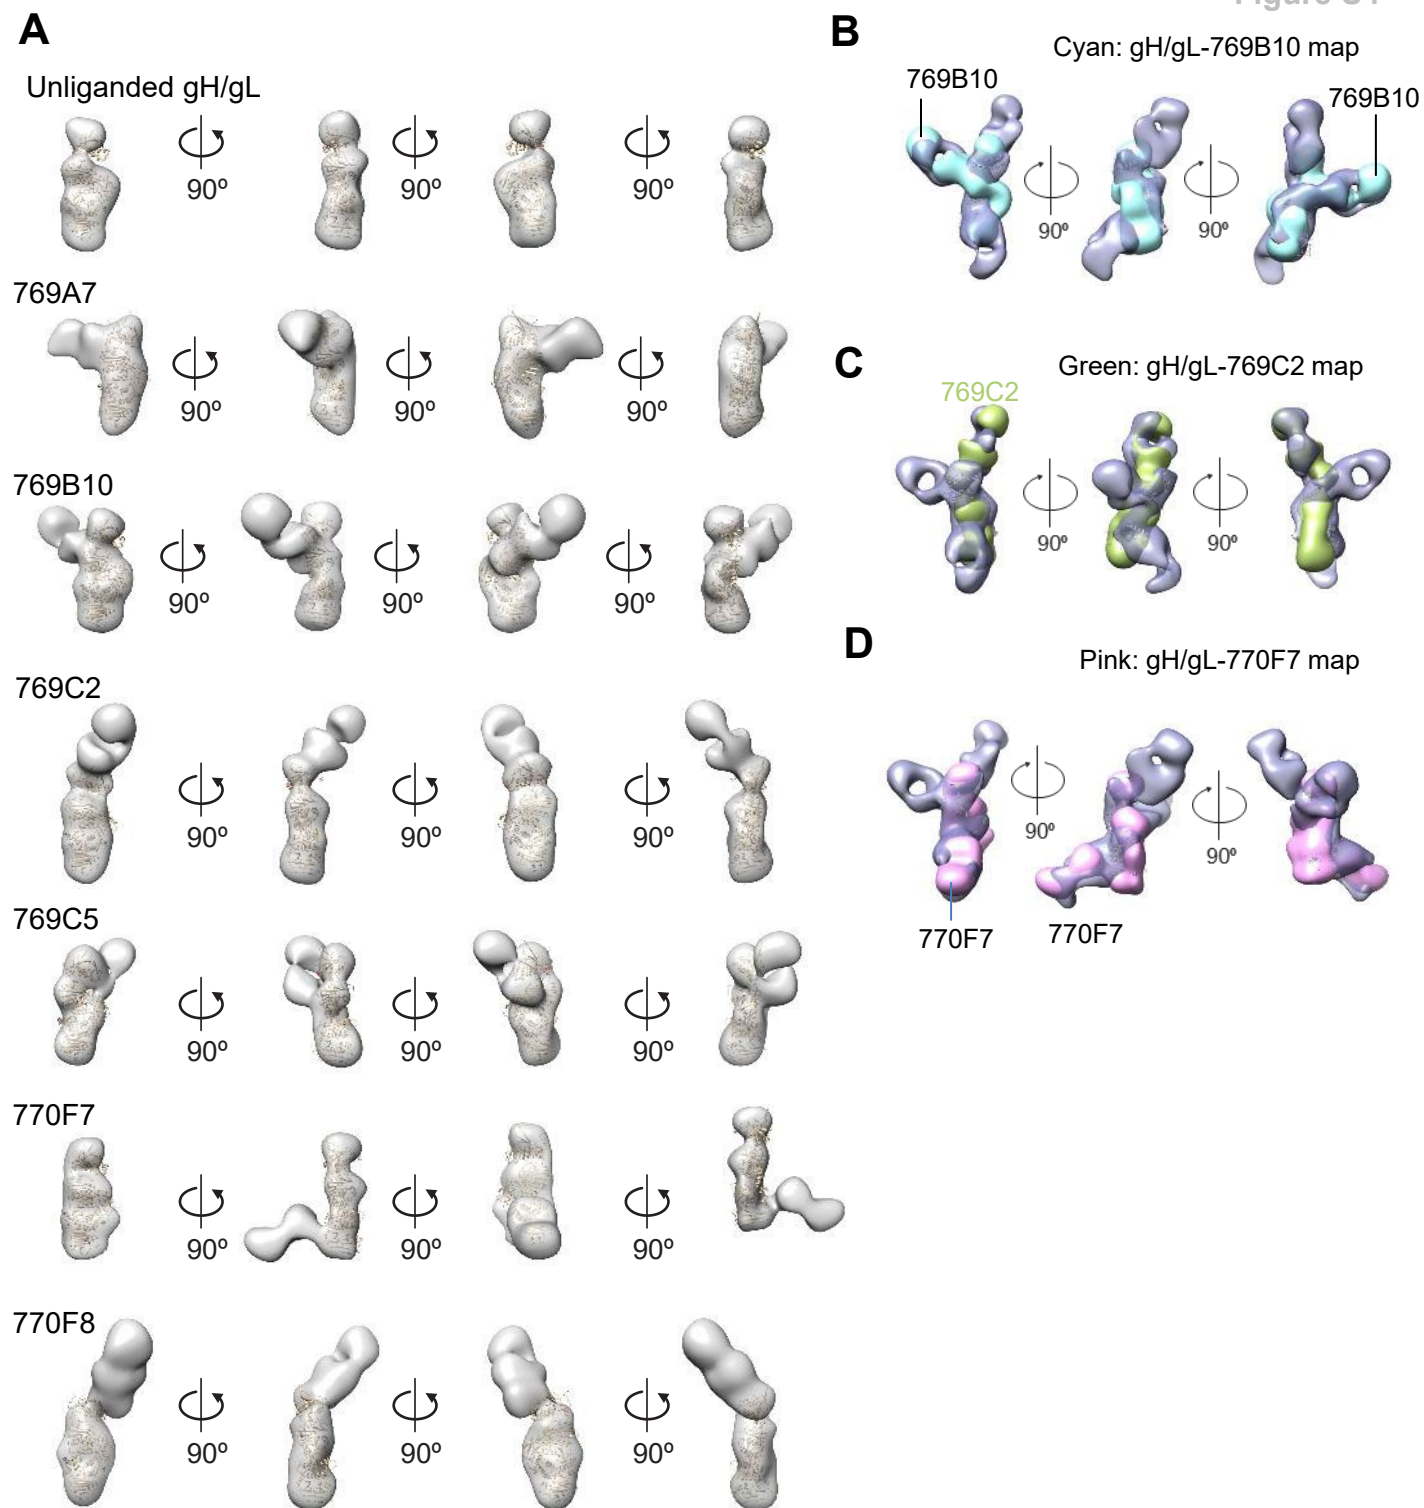

**Figure S4. Negative Stain EM 3D reconstruction of EBV gH/gL-targeting human antibodies (related to Figures 2-4)**

EBV gH/gL structure model is docked to the negative-stain EM maps.

(A) Negative-stain EM maps of gH/gL/gp42p molecule unliganded or in complex with single mAb Fab molecules 769A7, 769B10, 769C2, 769C5, 770F7, and 770F8.

(B-D) Comparison of the binary complexes from (A) for 769B10 (B), 769C2 (C), and 770F7 (D) were compared to a gH/gL/gp42p complex with 769B10, 769C2 and 770F7 Fabs bound.

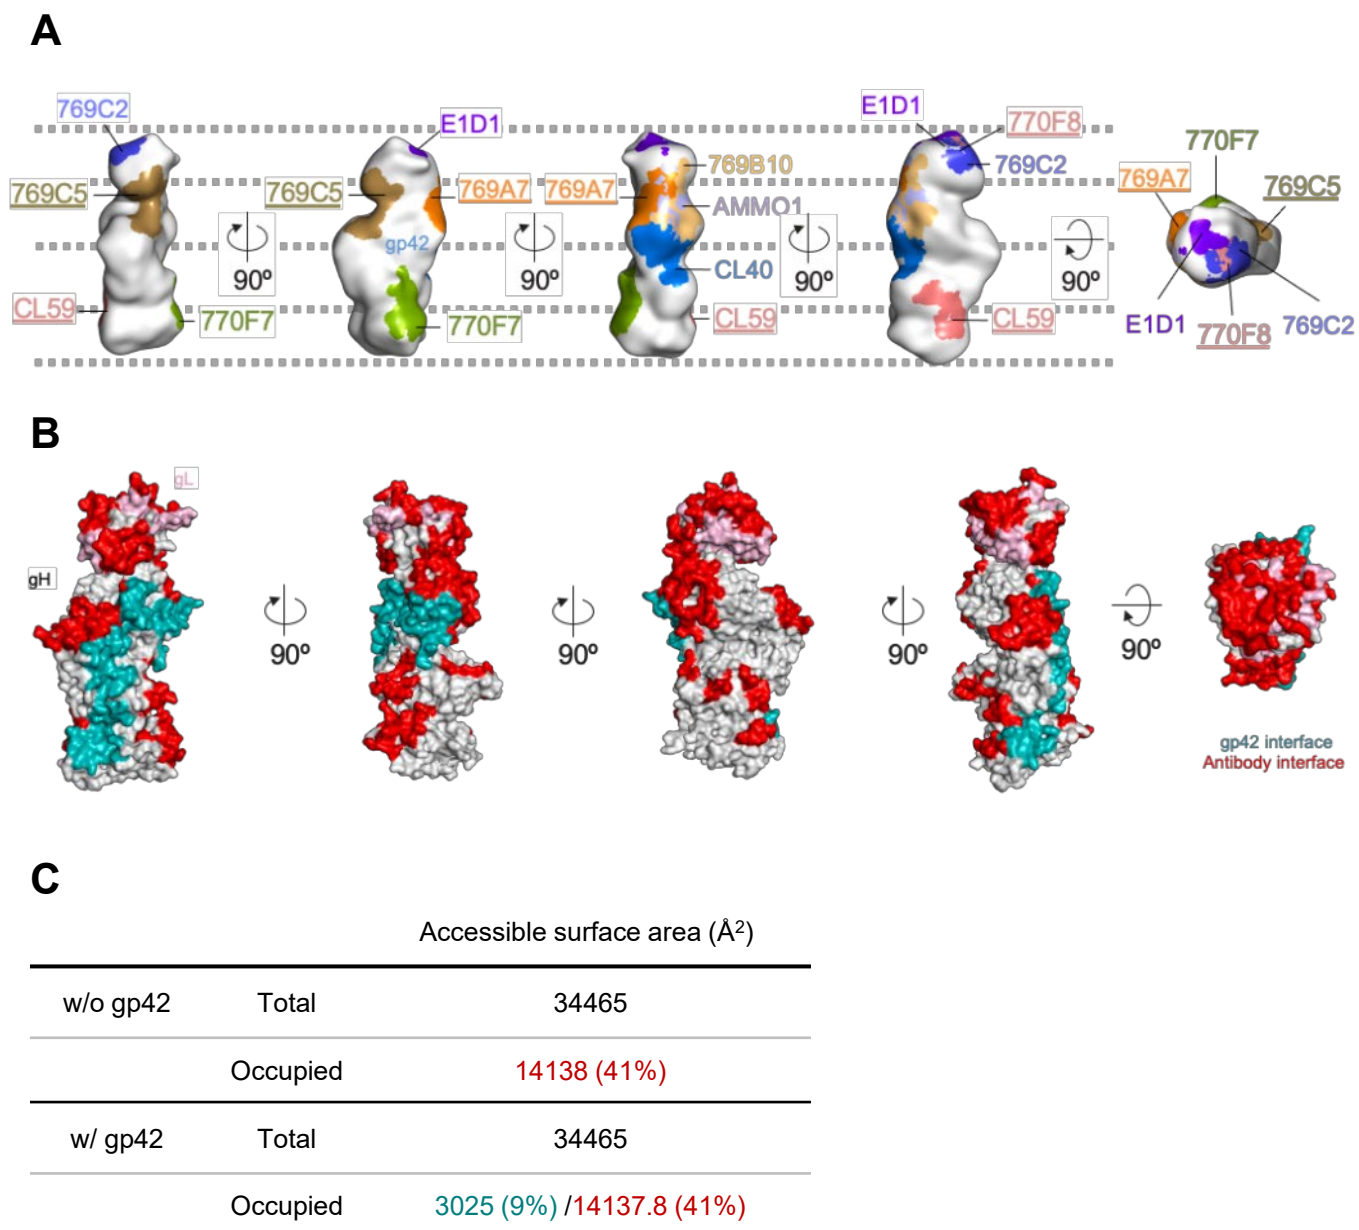

**Figure S5 Antigenic sites of vulnerability on the EBV gH/gL/gp42 fusion machinery (related to Figure 6)**

(A) EBV gH/gL is shown in surface representation with specific mAb epitopes indicated. Multiple rotation views are shown. EBV gH domains are indicated by dotted lines.

(B) EBV gH/gL is shown in surface representation with all mAb epitopes colored in red and gp42 domain interface colored in teal

(C) EBV gH/gL accessible surface area is shown with area bound by antibodies or gp42 indicated.

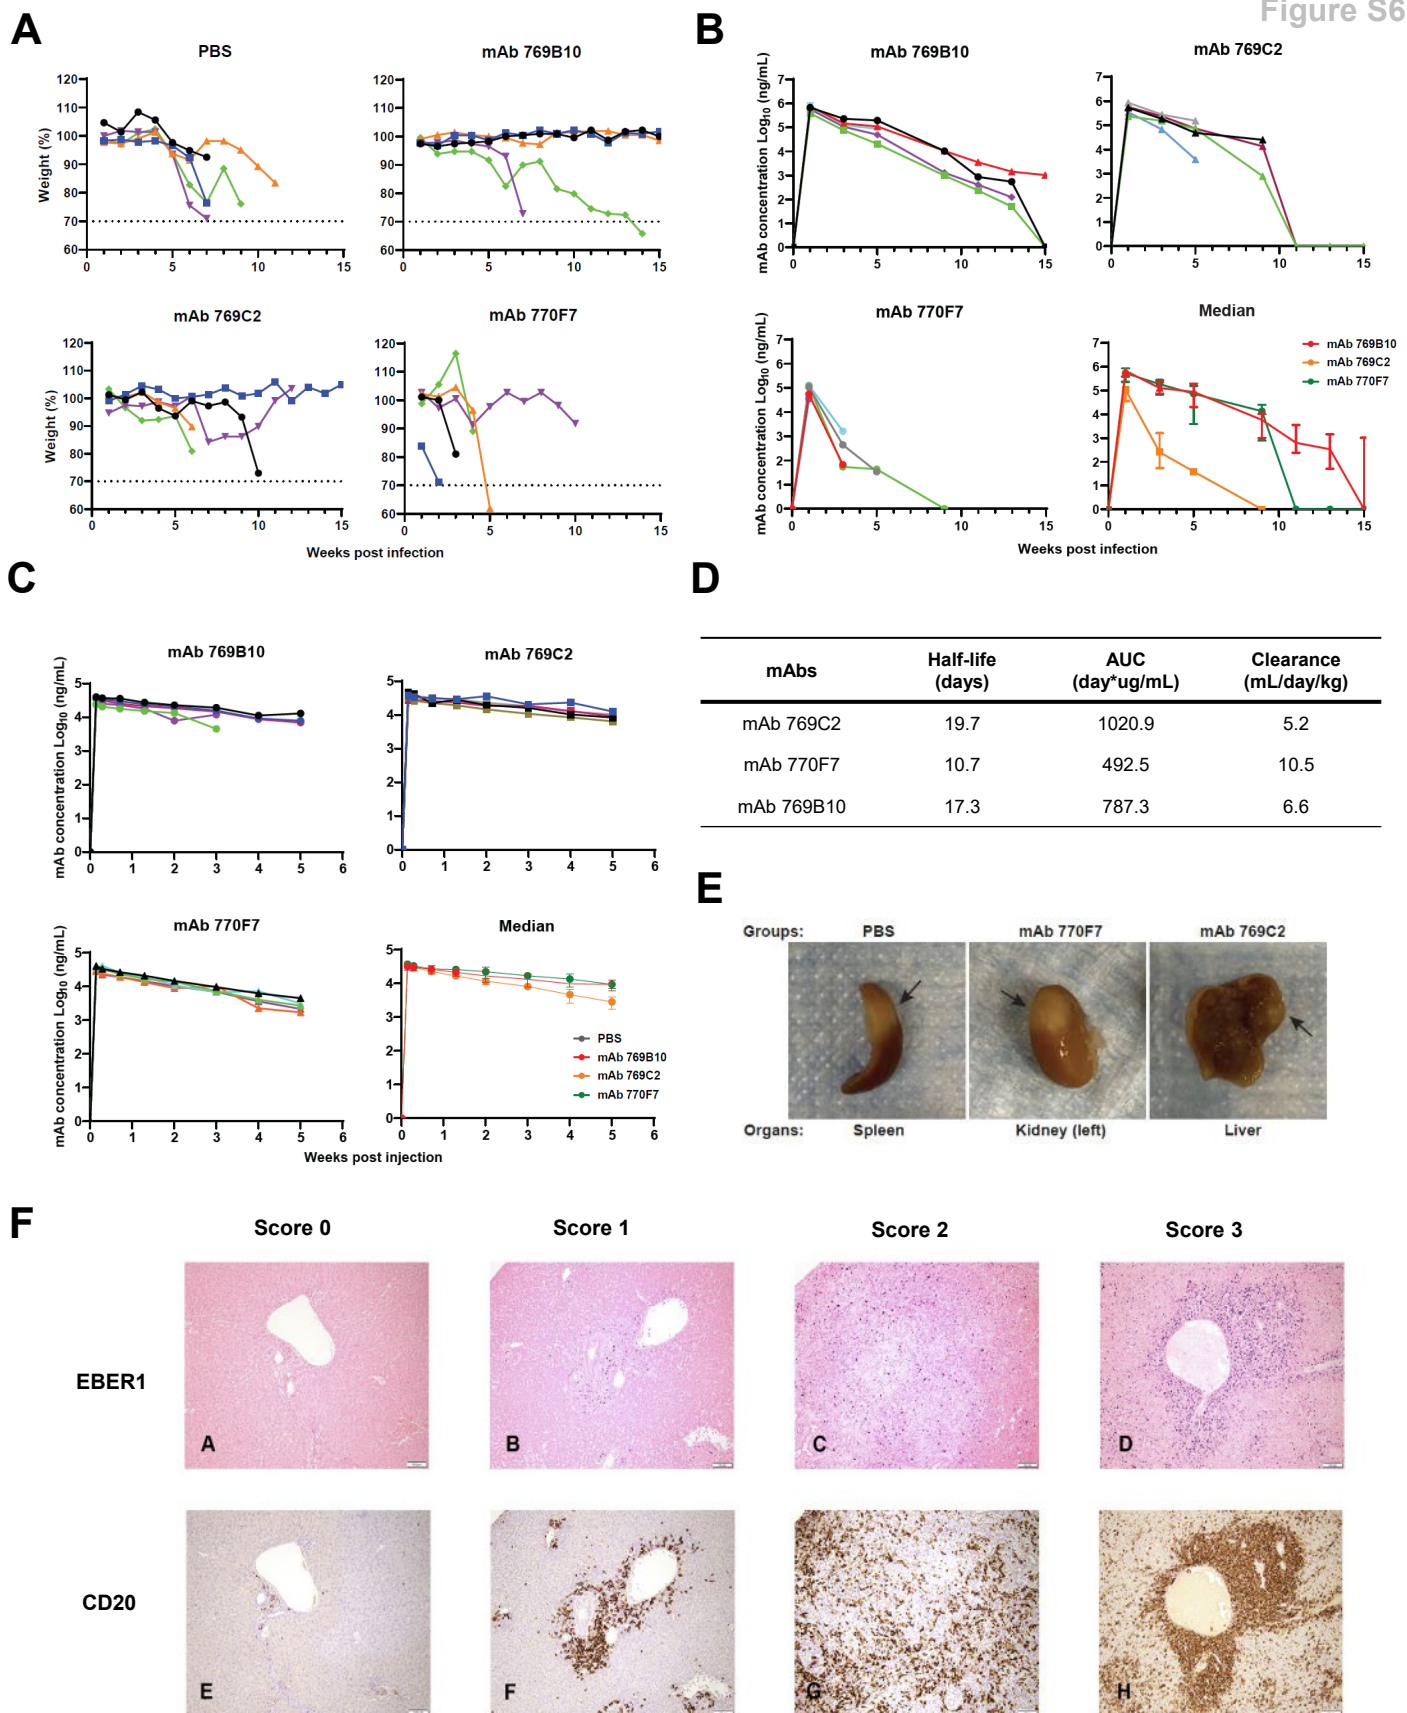

**Figure S6. Weight loss, antibody levels, and EBV lesions in humanized mice (related to Figure 7)**

(A) Percentage of weight in mice relative to the weight (set as 100%) before EBV challenge throughout the study were plotted. Each line indicates one mouse. The dotted line indicates the endpoint which is 30% weight loss.

(B) Concentration of gH/gL mAbs in the plasma of individual humanized mice at various times after EBV challenge were measured in duplicate by ELISA. The median and standard errors of gH/gL mAb concentrations for each group of 5 humanized mice are also shown.

(C) gH/gL mAb concentrations in the serum at various days after a single injection of mAb in individual human FcRn transgenic mice were quantified by ELISA assay to gH/gL in duplicate. The median and standard errors for each group of 5 mice are also shown.

(D) Half-life, area under the curve (AUC), and clearance rate of each mAb in each group of human FcRn transgenic mice was calculated using WinNonLin software.

(E) Macroscopic lesions observed on the surface of the spleen (left), kidney (middle), and liver (right) of humanized mice challenged with EBV.

(F) EBV EBER staining with eosin counterstain (upper panels) and CD20 staining (lower panels) in mice with lymphomas. Scores for EBV RNA signal in the upper panels are 0 (panel A), 1+ (panel B), 2+ (panel C), and 3+ (panel D). The lower panels show CD20 staining for the corresponding tissues in the upper panels.

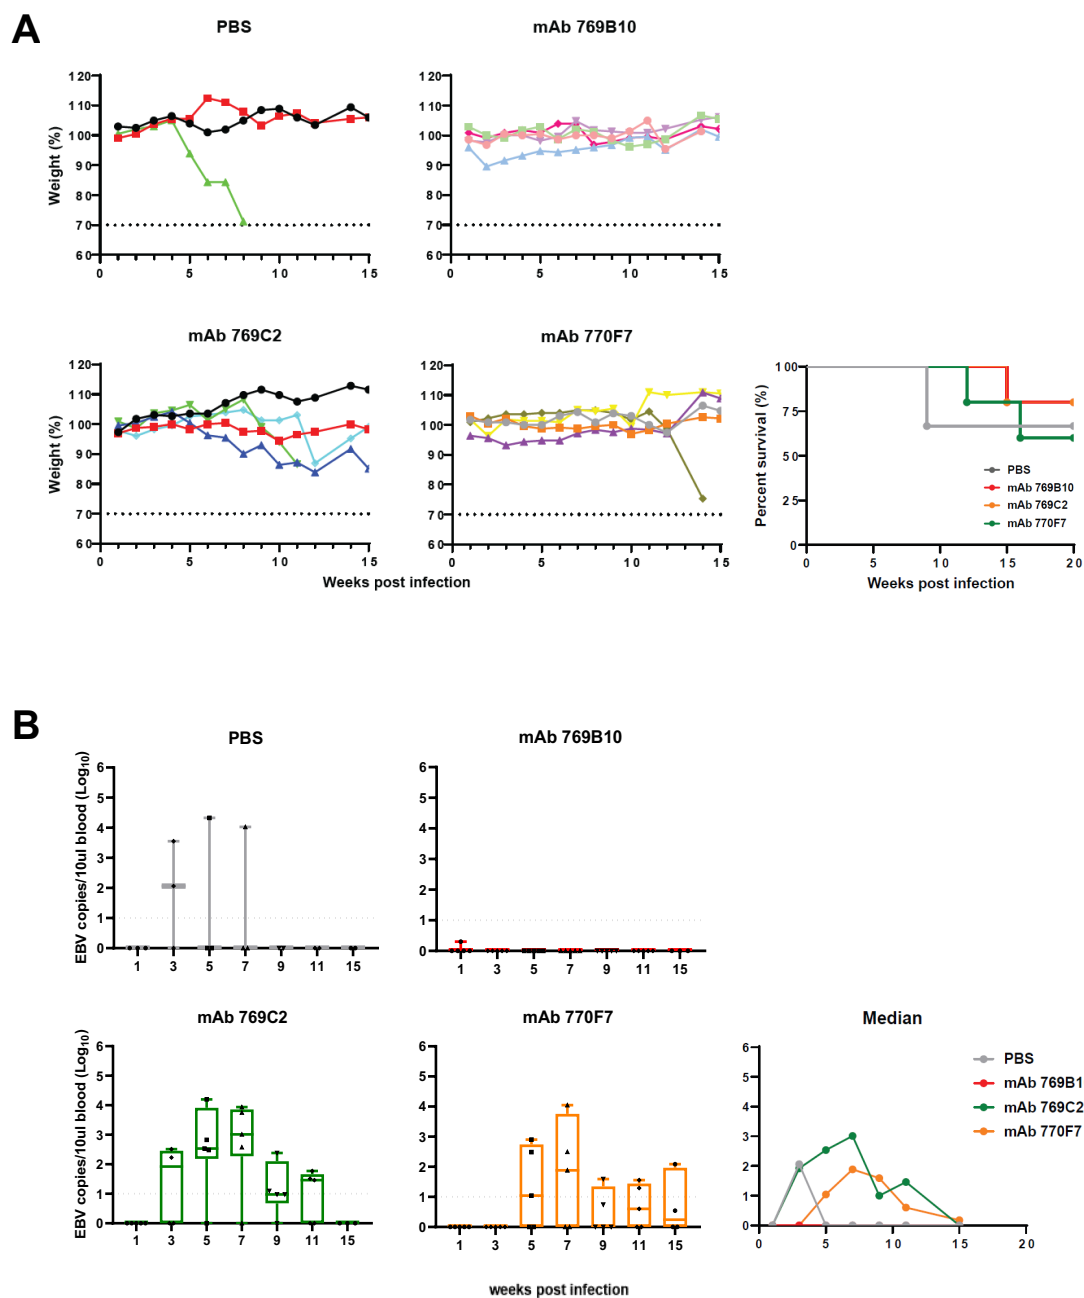

**Figure S7. Repeat experiment for passive transfer of gH/gL mAbs in humanized mice and challenge with EBV (related to Figure 7)**

(A) Survival rates of mice given six doses of gH/gL mAbs 769C2, 770F7, 769B10, or PBS intraperitoneally and challenged intravenously with EBV after the second dose of mAb.

(B) EBV DNA copies in the blood quantified by real-time qPCR in mice from panel A. Each dot represents one mouse, and the dotted line indicates the detection limit of the assay. Whiskers indicates minimum and maximum data points and box represents upper and lower quartiles; the horizontal line in the box is the median. Median EBV DNA copies in the blood were calculated.

Table S1. Crystal Data Collection and Refinement Statistics (related to Figures 2-4)

|                                         | EBV gH/gL/gp42p<br>+ 769C2 Fab + 769B10 Fab                         | EBV gH/gL/gp42p<br>+ 769C2 Fab + 770F7 Fab          | 769B10 Fab                                                             | 770F7 Fab                                                                       |
|-----------------------------------------|---------------------------------------------------------------------|-----------------------------------------------------|------------------------------------------------------------------------|---------------------------------------------------------------------------------|
| Crystallization condition               | 0.1M Bis-Tris pH6.5, 20%<br>PEG3350, 7.5% Glycerol,<br>0.7% Dioxane | 0.1M HEPES pH7.4,<br>24% PEG3350,<br>7.5% Glycerol. | 0.1M Tris-HCl pH8.0,<br>18% PEG5000MME,<br>0.2M NaCl,<br>2.5% Glycerol | 0.1M HEPES pH7.5,<br>0.1M CaCl <sub>2</sub> ,<br>25% PEG3350,<br>4% isopropanol |
| <b>Data collection</b>                  |                                                                     |                                                     |                                                                        |                                                                                 |
| Space group                             | P 2 <sub>1</sub>                                                    | P 2 <sub>1</sub>                                    | P 2 <sub>1</sub>                                                       | C 2                                                                             |
| Cell dimensions                         |                                                                     |                                                     |                                                                        |                                                                                 |
| a, b, c (Å)                             | 90.7, 130.4, 93.6                                                   | 89.3, 107.7, 110.7                                  | 56.2, 67.1, 65.0                                                       | 187.2, 40.2, 135.2                                                              |
| α, β, γ (°)                             | 90, 104.6, 90                                                       | 90, 93.1, 90                                        | 90, 107.6, 90                                                          | 90, 110.5, 90                                                                   |
| Resolution (Å)                          | 50.0 – 3.3<br>(3.6-3.5, 3.5-3.4, 3.2-3.3)                           | 50.0-3.0 (3.1-3.0)                                  | 41.8-2.2 (2.3-2.2)                                                     | 50.0-2.4 (2.5-2.4)                                                              |
| R <sub>sym</sub>                        | 0.303 (1.115, 1.267, 1.382)                                         | 0.203 (2.325)                                       | 0.189 (0.498)                                                          | 0.191 (0.962)                                                                   |
| I / σI                                  | 5.5 (1.21, 1.03, 0.94)                                              | 7.1 (0.87)                                          | 5.3 (1.92)                                                             | 8.7 (1.07)                                                                      |
| Reflections (total/unique)              | 136898/41284                                                        | 275778/40453                                        | 48517/22877                                                            | 160636/36186                                                                    |
| Completeness (%)                        | 88.0 (77.8, 68.4, 57.2)                                             | 89.7 (66.6)                                         | 89.7 (88.6)                                                            | 95.4 (84.3)                                                                     |
| Redundancy                              | 4.5 (3.7, 3.4, 3.0)                                                 | 6.8 (6.6)                                           | 2.4 (1.4)                                                              | 4.5 (2.5)                                                                       |
| CC <sub>(1/2)</sub>                     | 0.65 (0.35)                                                         | 0.99 (0.77)                                         | 0.82 (0.72)                                                            | 0.85 (0.522)                                                                    |
| R <sub>pim</sub>                        | 0.127 (0.78)                                                        | 0.078 (0.88)                                        | 0.109 (0.34)                                                           | 0.089 (0.55)                                                                    |
| <b>Refinement</b>                       |                                                                     |                                                     |                                                                        |                                                                                 |
| Resolution (Å)                          | 48.6-3.3 (3.4-3.3)                                                  | 50-3.3 (3.3-3.0)                                    | 41.9-2.2 (2.3-2.2)                                                     | 50.0-2.4 (2.5-2.4)                                                              |
| No. reflections                         | 31330 (205)                                                         | 36540 (2692)                                        | 22877(1928)                                                            | 67674(5342)                                                                     |
| R <sub>work</sub> / R <sub>free</sub> * | 25.3/29.7                                                           | 24.5/30.2                                           | 23.2/26.7                                                              | 20.5/25.8                                                                       |
| Ramachandran                            |                                                                     |                                                     |                                                                        |                                                                                 |
| favored/allowed/outliers                | 91.2/8.6/0.2                                                        | 90.3/9.3/0.4                                        | 95.0/4.8/0.2                                                           | 96.3/3.4/0.3                                                                    |
| B-Factor                                |                                                                     |                                                     |                                                                        |                                                                                 |
| Protein/water                           | 54.1/ n.a.                                                          | 46.6/ 50.5                                          | 30.8/ 35.6                                                             | 37.11/ 42.7                                                                     |
| R.m.s deviations                        |                                                                     |                                                     |                                                                        |                                                                                 |
| Bond lengths (Å)                        | 0.002                                                               | 0.009                                               | 0.003                                                                  | 0.002                                                                           |
| Bond angles (°)                         | 0.584                                                               | 0.675                                               | 0.532                                                                  | 0.600                                                                           |
| PDB ID                                  | 7S07                                                                | 7S1B                                                | 7S08                                                                   | 7S0J                                                                            |
| Deposition code                         | D_1000259334                                                        | D_1000259335                                        | D_1000259333                                                           | D_1000259217                                                                    |

Values in parentheses are shown for the highest-resolution data shells.

n.a.: not applicable

\* Rfree was calculated using ~5% randomly selected reflections.



Table S2A. 769B10 antibody interface with EBV gH (chain A), gL (chain B) (related to Figure 2)

|                       | <b>769B10</b>    | <b>Glycoprotein</b> | <b>Distance(Å)</b> |
|-----------------------|------------------|---------------------|--------------------|
| <b>Hydrogen bonds</b> | H:TYR 33[ OH ]   | A:SER 79[ O ]       | 3.51               |
|                       | H:ARG 52[ NH1]   | A:SER 79[ O ]       | 2.35               |
|                       | H:ASN 53[ OD1]   | A:THR 81[ N ]       | 3.21               |
|                       | H:ARG 64[ NH1]   | B:GLU 121[ OE2]     | 3.58               |
|                       | H:ARG 65[ NH2]   | B:ASP 57[ O ]       | 2.90               |
|                       | H:ARG 65[ NH2]   | B:ASP 57[ OD2]      | 2.41               |
|                       | H:TYR 97[ OH ]   | A:SER 79[ OG ]      | 2.90               |
|                       | H:TRP 100a[ O ]  | A:LEU 246[ N ]      | 3.14               |
|                       | H:TRP 100a[ O ]  | A:LYS 247[ N ]      | 3.01               |
|                       | H:TYR 100d[ O ]  | A:THR 78[ OG1]      | 2.15               |
|                       | H:TYR 100d[ O ]  | A:GLY 80[ N ]       | 3.59               |
|                       | H:TYR 100d[ O ]  | A:SER 79[ N ]       | 2.94               |
|                       | H:SER 100e[ O ]  | A:SER 79[ OG ]      | 3.33               |
|                       | H:SER 100e[ N ]  | A:SER 79[ OG ]      | 3.61               |
|                       | H:SER 100e[ OG ] | A:TYR 235[ OH ]     | 2.74               |
|                       | H:SER 100e[ OG ] | A:TYR 76[ OH ]      | 2.58               |
| <b>Salt Bridge</b>    | L:SER 67[ OG ]   | A:ASN 240[ ND2]     | 3.54               |
|                       | L:SER 30[ OG ]   | A:ASN 240[ OD1]     | 3.16               |
|                       | H:ARG 64[ NH1]   | B:GLU 121[ OE2]     | 3.58               |
|                       | H:ARG 65[ NE ]   | B:ASP 122[ OD2]     | 3.79               |
|                       | H:ARG 65[ NH2]   | B:ASP 57[ OD2]      | 2.41               |
|                       | L:ASP 1[ OD1]    | A:LYS 73[ NZ ]      | 3.60               |

H: 769B10 heavy chain; L: 769B10 light chain; A: gH; B: gL

Table S2B. 769C2 interface with EBV gH (chain A), gL (chain B) (related to Figure 3)

|                       | <b>769C2</b>   | <b>Glycoprotein</b> | <b>Distance (Å)</b> |
|-----------------------|----------------|---------------------|---------------------|
| <b>Hydrogen bonds</b> | X:SER 30[ O ]  | B:GLN 54[ NE2]      | 3.80                |
|                       | X:SER 52[ OG ] | A:GLU 30[ O ]       | 2.99                |
|                       | X:SER 52a[ N ] | A:GLU 30[ O ]       | 3.57                |
|                       | Y:GLY 31[ O ]  | A:LYS 24[ NZ ]      | 2.61                |
|                       | Y:TYR 32[ OH ] | A:THR 37[ N ]       | 3.57                |
|                       | Y:TYR 32[ OH ] | A:HIS 35[ O ]       | 3.62                |
|                       | Y:TYR 32[ OH ] | B:HIS 103[ NE2]     | 3.11                |
|                       | Y:ASP 33[ OD2] | B:LYS 68[ NZ ]      | 3.41                |
|                       | Y:TYR 93[ OH ] | A:SER 34[ OG ]      | 2.33                |
|                       | Y:TYR 93[ OH ] | A:HIS 35[ O ]       | 3.48                |
| <b>Salt Bridge</b>    | Y:ASP 33[ OD2] | B:LYS 68[ NZ ]      | 3.41                |

X: 769C2 heavy chain; Y: 769C2 light chain; A: gH; B: gL

Table S2C. 770F7 interface with EBV gH (chain A) (related to Figure 4)

|                           | 770F7              | Glycoprotein    | Distance<br>(Å) |
|---------------------------|--------------------|-----------------|-----------------|
| <b>Hydrogen<br/>bonds</b> | H:SER 28[ N ]      | A:ASP 536[ O ]  | 3.00            |
|                           | H:TYR 32[ OH ]     | A:LYS 533[ O ]  | 3.57            |
|                           | H:TYR 32[ OH ]     | A:VAL 535[ O ]  | 2.48            |
|                           | H:ARG 94[ NH2]     | A:LYS 533[ O ]  | 3.87            |
|                           | H:ARG 94[ NH2]     | A:VAL 535[ O ]  | 3.70            |
|                           | H:ARG 94[ NH2]     | A:ASP 536[ OD1] | 3.45            |
|                           | H:TRP 100[ NE1]    | A:TYR 532[ OH ] | 3.38            |
|                           | H:ALA 100A[ N ]    | A:ASP 525[ OD2] | 3.53            |
|                           | H:LEU 100B[ N ]    | A:GLU 522[ OE2] | 3.90            |
|                           | H:LYS 100C[ N ]    | A:GLU 522[ OE2] | 3.44            |
|                           | H:ARG 100D[ NH1]   | A:ASP 525[ OD1] | 2.24            |
|                           | H:ARG 100D[ NH2]   | A:LEU 432[ O ]  | 3.76            |
|                           | H:ARG 100D[ NH2]   | A:ARG 433[ O ]  | 3.84            |
|                           | H:ARG 100D[ NH1]   | A:GLU 522[ O ]  | 3.64            |
|                           | H:ARG 100D[ NH2]   | A:GLU 522[ O ]  | 3.65            |
|                           | H:ARG 100D[ NH2]   | A:LEU 432[ O ]  | 3.76            |
|                           | <b>Salt Bridge</b> | L:TYR 32[ OH ]  | A:ASN 435[ O ]  |
| L:TYR 32[ OH ]            |                    | A:ASN 435[ OD1] | 3.61            |
| L:TYR 49[ OH ]            |                    | A:LYS 533[ NZ ] | 3.17            |
| H:ARG 100D[ NH1]          |                    | A:ASP 525[ OD1] | 2.24            |
| H:ARG 100D[ NH1]          |                    | A:ASP 525[ OD2] | 3.23            |
| H:ARG 94[ NH2]            |                    | A:ASP 536[ OD1] | 3.45            |

H: 769C2 heavy chain; L: 769C2 light chain; A: gH

Table S3A. Buried surface area of 769B10 antibody in complex with gH/gL/gp42p (related to Figure 2)

|            | B10 antibody residues | Bond type | Accessible Surface Area (Å <sup>2</sup> ) | Buried Surface Area (Å <sup>2</sup> ) |
|------------|-----------------------|-----------|-------------------------------------------|---------------------------------------|
| gH         | H:TYR 33              | H         | 1.2                                       | 0.3                                   |
|            | H:ARG 50              |           | 17.5                                      | 5.4                                   |
|            | H:ARG 52              | H         | 57.4                                      | 30.4                                  |
|            | H:GLU 52c             |           | 120.5                                     | 43.7                                  |
|            | H:ASN 53              | H         | 39.2                                      | 23.8                                  |
|            | H:TYR 97              | H         | 38.7                                      | 6.1                                   |
|            | H:ASP 99              |           | 56.6                                      | 4.6                                   |
|            | H:LEU 100             |           | 83.99                                     | 17.2                                  |
|            | H:TRP 100a            | H         | 216.1                                     | 123.9                                 |
|            | H:SER 100b            |           | 65.5                                      | 50.3                                  |
|            | H:GLY 100c            |           | 29.9                                      | 29.0                                  |
|            | H:TYR 100d            | H         | 81.8                                      | 77.2                                  |
|            | H:SER 100e            | H         | 105.4                                     | 73.4                                  |
|            | H:ASN 100g            |           | 12.7                                      | 0.9                                   |
| H:TRP 100h |                       | 80.4      | 3.8                                       |                                       |
| gH         | L:ASP 1               | S         | 123.8                                     | 30.8                                  |
|            | L:GLN 27              |           | 84.9                                      | 11.3                                  |
|            | L:THR 28              |           | 89.5                                      | 51.6                                  |
|            | L:MET 29              |           | 2.2                                       | 2.2                                   |
|            | L:SER 30              | H         | 53.3                                      | 49.7                                  |
|            | L:ASN 31              |           | 52.3                                      | 22.1                                  |
|            | L:PHE 32              |           | 81.5                                      | 34.4                                  |
|            | L:SER 67              |           | 76.3                                      | 6.7                                   |
|            | L:GLY 68              |           | 22.3                                      | 0.8                                   |
|            | L:PHE 92              |           | 97.8                                      | 79.2                                  |
|            | L:LEU 93              |           | 46.6                                      | 39.7                                  |
|            | L:PHE 94              |           | 157.4                                     | 3.4                                   |
|            | L:TYR 96              |           | 120.3                                     | 25.8                                  |
| gL         | H:GLU 58              |           | 86.4                                      | 19.7                                  |
|            | H:ALA 61              |           | 87.2                                      | 17.6                                  |
|            | H:ARG 64              | HS        | 129.6                                     | 92.0                                  |
|            | H:ARG 65              | HS        | 232.0                                     | 69.9                                  |
| gL         | L:PHE 94              |           | 157.4                                     | 27.7                                  |
|            | L:PRO 95              |           | 72.0                                      | 2.0                                   |

Bond Type: H: Hydrogen bond; S: Salt bridge

mAb chain: H: 769B10 heavy chain; L: 769B10 light chain

Table S3B. Buried surface area of gH/gL in complex with 769B10 (related to Figure 2)

|             | gH/gL residues | Bond type | Accessible Surface Area (Å <sup>2</sup> ) | Buried Surface Area (Å <sup>2</sup> ) |
|-------------|----------------|-----------|-------------------------------------------|---------------------------------------|
| Heavy chain | A:TYR 76       | H         | 30.4                                      | 20.8                                  |
|             | A:LYS 77       |           | 46.5                                      | 0.3                                   |
|             | A:THR 78       | H         | 29.8                                      | 18.0                                  |
|             | A:SER 79       | H         | 128.2                                     | 104.8                                 |
|             | A:GLY 80       | H         | 39.6                                      | 32.4                                  |
|             | A:THR 81       | H         | 52.6                                      | 31.0                                  |
|             | A:LEU 82       |           | 94.8                                      | 85.0                                  |
|             | A:GLY 83       |           | 57.8                                      | 25.2                                  |
|             | A:SER 218      |           | 19.1                                      | 12.2                                  |
|             | A:ILE 228      |           | 12.5                                      | 0.2                                   |
|             | A:TYR 235      |           | 64.4                                      | 23.5                                  |
|             | A:HIS 239      |           | 89.7                                      | 4.1                                   |
|             | A:VAL 243      |           | 83.6                                      | 38.2                                  |
|             | A:PRO 244      |           | 36.5                                      | 15.9                                  |
|             | A:ASN 245      |           | 78.5                                      | 29.1                                  |
| A:LEU 246   | H              | 42.2      | 26.1                                      |                                       |
| A:LYS 247   | H              | 101.8     | 26.0                                      |                                       |
| Light chain | A:LYS 73       | S         | 133.9                                     | 29.8                                  |
|             | A:TYR 76       |           | 30.4                                      | 9.5                                   |
|             | A:LYS 77       |           | 46.4                                      | 3.7                                   |
|             | A:SER 79       |           | 128.2                                     | 23.4                                  |
|             | A:PHE 232      |           | 91.0                                      | 72.0                                  |
|             | A:VAL 233      |           | 89.4                                      | 29.7                                  |
|             | A:TYR 235      |           | 64.4                                      | 22.9                                  |
|             | A:ALA 236      | H         | 58.8                                      | 58.8                                  |
|             | A:ASN 237      |           | 53.1                                      | 3.7                                   |
|             | A:HIS 239      |           | 89.7                                      | 57.8                                  |
| A:ASN 240   |                | 122.7     | 38.6                                      |                                       |
| Heavy chain | B:ASP 57       | H         | 119.6                                     | 26.0                                  |
|             | B:GLY 58       |           | 14.5                                      | 2.5                                   |
|             | B:SER 119      |           | 32.7                                      | 1.6                                   |
|             | B:GLU 121      | HS        | 150.7                                     | 46.9                                  |
|             | B:ASP 122      | S         | 113.5                                     | 81.8                                  |
|             | B:LEU 123      | H         | 97.6                                      | 11.2                                  |
| Light chain | B:PHE 124      |           | 259.2                                     | 28.4                                  |
|             | B:GLU 121      |           | 150.7                                     | 29.4                                  |

H: Hydrogen bond; S: Salt bridge; A: gH; B: gL

Table S4A. Buried surface area of mAb 769C2 in complex with gH/gL/gp42p (related to Figure 3)

|             | 769C2 residues | Bond type | Accessible Surface Area (Å <sup>2</sup> ) | Buried Surface Area (Å <sup>2</sup> ) |
|-------------|----------------|-----------|-------------------------------------------|---------------------------------------|
| Heavy chain | A:HIS 26       |           | 128.2                                     | 22.7                                  |
|             | A:LEU 27       |           | 78.0                                      | 3.0                                   |
|             | A:ASP 28       |           | 115.3                                     | 43.0                                  |
|             | A:ILE 29       |           | 88.9                                      | 44.3                                  |
|             | A:GLU 30       |           | 159.2                                     | 79.9                                  |
|             | A:GLY 31       |           | 68.3                                      | 68.3                                  |
|             | A:HIS 32       |           | 132.8                                     | 80.6                                  |
|             | A:ALA 33       |           | 45.1                                      | 42.4                                  |
|             | A:SER 34       |           | 17.9                                      | 0.5                                   |
|             | A:HIS 35       |           | 120.3                                     | 32.6                                  |
| A:TYR 36    |                | 114.1     | 0.8                                       |                                       |
| Light chain | A:LYS 24       | H         | 104.0                                     | 36.8                                  |
|             | A:HIS 26       |           | 128.2                                     | 22.3                                  |
|             | A:HIS 32       |           | 132.8                                     | 52.2                                  |
|             | A:ALA 33       |           | 45.1                                      | 2.7                                   |
|             | A:SER 34       | H         | 17.9                                      | 14.0                                  |
|             | A:HIS 35       | H         | 120.3                                     | 83.6                                  |
|             | A:TYR 36       |           | 114.1                                     | 10.3                                  |
| A:THR 37    | H              | 76.0      | 19.2                                      |                                       |
| Heavy chain | B:TYR 49       |           | 121.5                                     | 50.5                                  |
|             | B:LEU 50       |           | 59.9                                      | 14.2                                  |
|             | B:VAL 51       |           | 40.9                                      | 12.5                                  |
|             | B:GLN 54       | H         | 166.6                                     | 58.3                                  |
|             | B:GLU 106      |           | 118.4                                     | 13.5                                  |
| B:THR 110   |                | 72.5      | 2.8                                       |                                       |
| Light chain | B:TYR 49       |           | 121.5                                     | 17.3                                  |
|             | B:LYS 68       | HS        | 182.6                                     | 29.6                                  |
|             | B:HIS 103      | H         | 143.8                                     | 58.5                                  |
|             | B:GLU 106      |           | 118.4                                     | 8.1                                   |

H: Hydrogen bond; S: Salt bridge; A: gH; B: gL

Table S4B. Buried surface area of gH/gL/gp42p in complex with 769C2 (related to Figure 3)

|            | 769C2 residues | Bond type | Accessible Surface Area (Å <sup>2</sup> ) | Buried Surface Area (Å <sup>2</sup> ) |
|------------|----------------|-----------|-------------------------------------------|---------------------------------------|
| gH         | X:SER 30       |           | 31.9                                      | 1.0                                   |
|            | X:THR 31       |           | 98.0                                      | 23.2                                  |
|            | X:TYR 32       |           | 62.0                                      | 1.3                                   |
|            | X:ALA 33       |           | 16.7                                      | 16.7                                  |
|            | X:LEU 50       |           | 32.7                                      | 16.3                                  |
|            | X:SER 52       | H         | 22.7                                      | 22.4                                  |
|            | X:SER 52a      | H         | 28.6                                      | 24.6                                  |
|            | X:ARG 53       |           | 165.3                                     | 2.3                                   |
|            | X:SER 55       |           | 74.5                                      | 6.2                                   |
|            | X:ASN 56       |           | 83.4                                      | 26.0                                  |
|            | X:TYR 58       |           | 119.5                                     | 34.9                                  |
|            | X:GLU 95       |           | 48.7                                      | 31.9                                  |
|            | X:GLY 97       |           | 24.6                                      | 17.9                                  |
|            | X:GLY 98       |           | 81.6                                      | 39.6                                  |
|            | X:PHE 99       |           | 208.3                                     | 94.6                                  |
| X:HIS 100  |                | 116.6     | 7.3                                       |                                       |
| X:SER 100a |                | 117.3     | 29.2                                      |                                       |
| gH         | Y:GLY 31       | H         | 44.6                                      | 23.7                                  |
|            | Y:TYR 32       | H         | 98.2                                      | 79.4                                  |
|            | Y:TYR 34       |           | 140.4                                     | 55.3                                  |
|            | Y:TYR 93       | H         | 100.1                                     | 82.9                                  |
|            | Y:THR 95       |           | 85.1                                      | 7.2                                   |
|            | Y:THR 98       |           | 86.3                                      | 22.1                                  |
|            | Y:TRP 99       |           | 174.4                                     | 21.2                                  |
| gL         | X:SER 30       | H         | 31.9                                      | 4.8                                   |
|            | X:THR 31       |           | 98.0                                      | 10.6                                  |
|            | X:SER 52a      |           | 28.6                                      | 4.0                                   |
|            | X:ARG 53       |           | 165.3                                     | 26.0                                  |
|            | X:TYR 58       |           | 119.5                                     | 14.7                                  |
|            | X:PHE 99       |           | 208.3                                     | 89.7                                  |
| gL         | Y:TYR 32       | H         | 98.2                                      | 18.9                                  |
|            | Y:ASP 33       | HS        | 97.8                                      | 28.5                                  |
|            | Y:TYR 34       |           | 140.4                                     | 18.5                                  |
|            | Y:VAL 53       |           | 36.9                                      | 2.4                                   |
|            | Y:TYR 93       |           | 100.0                                     | 4.0                                   |
|            | Y:THR 95       |           | 85.0                                      | 47.5                                  |

H: Hydrogen bond; S: Salt bridge; X: 769C2 heavy chain; Y: 769C2 light chain

Table S5A. Buried surface area of 770F7 antibody in complex with EBV gH (related to Figure 4)

|            | 770F7 residues | Bond type | Accessible Surface Area (Å <sup>2</sup> ) | Buried Surface Area (Å <sup>2</sup> ) |
|------------|----------------|-----------|-------------------------------------------|---------------------------------------|
| gH         | H:GLN 1        |           | 172.6                                     | 67.1                                  |
|            | H:VAL 2        |           | 18.9                                      | 16.9                                  |
|            | H:GLY 26       |           | 79.5                                      | 50.8                                  |
|            | H:GLY 27       |           | 32.1                                      | 31.5                                  |
|            | H:SER 28       | H         | 58.0                                      | 49.9                                  |
|            | H:SER 30       |           | 46.6                                      | 34.7                                  |
|            | H:GLY 31       |           | 3.3                                       | 1.2                                   |
|            | H:TYR 32       | H         | 46.2                                      | 46.0                                  |
|            | H:THR 54       |           | 106.2                                     | 11.2                                  |
|            | H:ASN 76       |           | 43.8                                      | 10.6                                  |
|            | H:ARG 94       | HS        | 30.9                                      | 36.8                                  |
|            | H:GLY 96       |           | 15.0                                      | 22.6                                  |
|            | H:ALA 97       |           | 12.7                                      | 19.4                                  |
|            | H:PRO 98       |           | 63.3                                      | 75.7                                  |
|            | H:TRP 100      | H         | 122.4                                     | 164.3                                 |
|            | H:ALA 100A     | H         | 46.4                                      | 46.4                                  |
|            | H:LEU 100B     | H         | 15.2                                      | 131.4                                 |
|            | H:LYS 100C     | H         | 33.0                                      | 190.2                                 |
|            | H:ARG 100D     | HS        | 121.7                                     | 140.3                                 |
|            | H:PRO 100E     |           | 35.9                                      | 103.7                                 |
| H:ASN 100G |                | 15.0      | 43.5                                      |                                       |
| H:TRP 100H |                | 22.7      | 157.0                                     |                                       |
| gH         | L:THR 31       |           | 91.0                                      | 16.9                                  |
|            | L:TYR 32       |           | 101.1                                     | 35.6                                  |
|            | L:ARG 45       |           | 127.6                                     | 11.2                                  |
|            | L:TYR 49       | H         | 111.7                                     | 39.1                                  |
|            | L:SER 53       |           | 44.8                                      | 5.9                                   |
|            | L:ARG 54       |           | 105.1                                     | 1.7                                   |
|            | L:ALA 56       |           | 106.7                                     | 65.3                                  |
|            | L:GLY 57       |           | 79.2                                      | 29.9                                  |
|            | L:ILE 58       |           | 22.3                                      | 1.0                                   |

Bond type: H: Hydrogen bond; S: Salt bridge  
mAb chain: H: 769C2 heavy chain; L: 769C2 light chain

Table S5B. Buried surface area of 770F7 antibody in complex with gH (related to Figure 4)

|             | gH/gL residues | Bond type | Accessible Surface Area (Å <sup>2</sup> ) | Buried Surface Area (Å <sup>2</sup> ) |
|-------------|----------------|-----------|-------------------------------------------|---------------------------------------|
| Heavy chain | A:LEU 432      | H         | 7.1                                       | 2.1                                   |
|             | A:ARG 433      | H         | 88.8                                      | 7.8                                   |
|             | A:LEU 434      | H         | 48.8                                      | 1.4                                   |
|             | A:ASN 435      |           | 122.8                                     | 42.1                                  |
|             | A:SER 519      |           | 54.8                                      | 33.1                                  |
|             | A:GLU 520      |           | 144.0                                     | 59.3                                  |
|             | A:GLU 522      | H         | 108.0                                     | 71.1                                  |
|             | A:ASP 525      | HS        | 50.6                                      | 41.9                                  |
|             | A:TRP 527      |           | 171.9                                     | 117.8                                 |
|             | A:TYR 532      | H         | 39.4                                      | 32.5                                  |
|             | A:LYS 533      | H         | 136.9                                     | 81.7                                  |
|             | A:VAL 535      | H         | 7.6                                       | 6.9                                   |
|             | A:ASP 536      | HS        | 82.7                                      | 81.3                                  |
|             | A:ARG 537      |           | 126.2                                     | 60.3                                  |
|             | A:LEU 538      |           | 79.1                                      | 71.8                                  |
|             | A:ASP 539      |           | 118.4                                     | 41.6                                  |
|             | A:GLU 559      |           | 75.2                                      | 26.4                                  |
|             | A:ARG 561      |           | 53.6                                      | 26.2                                  |
|             | A:GLN 589      |           | 189.0                                     | 9.6                                   |
|             | A:GLY 590      |           | 33.2                                      | 10.5                                  |
|             | A:ALA 591      |           | 34.4                                      | 8.8                                   |
| Light chain | A:ASN 435      |           | 122.8                                     | 17.9                                  |
|             | A:VAL 436      |           | 120.1                                     | 23.6                                  |
|             | A:TRP 527      |           | 171.9                                     | 3.6                                   |
|             | A:LYS 533      | H         | 136.9                                     | 33.1                                  |
|             | A:LYS 586      |           | 149.4                                     | 20.7                                  |
|             | A:CYS 587      |           | 41.6                                      | 16.9                                  |
|             | A:SER 588      |           | 45.3                                      | 6.2                                   |
|             |                | A:GLN 589 |                                           | 189.0                                 |

H: Hydrogen bond; S: Salt bridge; A: gH
